# Supplementary material
Source: Research Square preprint supplement (doi:10.21203/rs.3.rs-8826108/v1)
Supplement: Supplementary file 1 [file 538b64c4dc5c1e89597bb248.docx]

**Supplementary Table 1.** Demographic, clinical, and laboratory characteristics of patients with colorectal adenosquamous carcinoma (n=45)

| Variables | Colorectal adenosquamous carcinoma (n=45) |
| --- | --- |
| Age, y, mean ± SD | 57.6±14.0 |
| Male / Female, n (%) | 29 (64.4)/ 16 (35.6) |
| BMI, kg/m2, mean ± SD | 22.0±2.6 |
| Preoperational CEA, U/ml, median (IQR) | 4.7 (2.8-14.1） |
| Preoperational CA-199, U/ml, median (IQR) | 28.3 (5.3-150.0) |
| Postoperational CEA, U/ml, median (IQR) | 2.6 (1.7-6.4) |
| Postoperational CA-199, U/ml, median (IQR) | 11.5 (3.6-184.0) |
| Tumor differentiation of adenocarcinoma, n (%) (known, n=39) |  |
| Well-differentiated | 1 (2.6) |
| Moderately differentiated | 31 (79.5) |
| Poorly differentiated | 7 (17.9) |
| Tumor differentiation of squamous cell carcinoma, n (%) (known, n=36) |  |
| Well-differentiated | 14 (38.9) |
| Moderately differentiated | 16 (44.4) |
| Poorly differentiated | 6 (16.7) |
| Proportion of adenocarcinoma, median (IQR) | 60 (30-80) |
| Proportion of squamous cell carcinoma, median (IQR) | 40 (20-70) |
| Neoadjuvant chemotherapy, n (%) | 9 (20.0) |
| Neoadjuvant radiotherapy, n (%) | 2 (4.4) |
| Adjuvant chemotherapy, n (%) | 19 (42.2) |
| Pathological type of lymphatic metastasis, n (%) (known, n = 15) |  |
| Adenocarcinoma | 10 (66.7) |
| Squamous cell carcinoma | 3 (20.0) |
| Adenosquamous carcinoma | 2 (13.3) |
| Microsatellite instability status, n (%) (known, n = 34) |  |
| pMMR/MSS | 27 (79.4) |
| dMMR/MSI-H | 7 (20.6) |
| Tumor primary site, n (%) |  |
| Right-sided colon | 12 (26.7) |
| Left-sided colon | 14 (31.1) |
| Rectum | 19 (42.2) |
| Tumor size, cm, mean ± SD | 5.3±2.6 |
| Clinical T stage, n (%) |  |
| T2 | 3 (6.7) |
| T3 | 22 (48.9) |
| T4 | 20 (44.4) |
| Clinical N stage, n (%) |  |
| N0 | 8 (17.8) |
| N1 | 15 (33.3) |
| N2 | 22 (48.9) |
| Clinical M stage, n (%) |  |
| M0 | 30 (66.7) |
| M1 | 15 (33.3) |
| Clinical TNM stage, n (%) |  |
| I | 2 (4.4) |
| Ⅱ | 6 (13.3) |
| Ⅲ | 22 (48.9) |
| IV | 15 (33.3) |
